# Supplementary material
Source: PubMed Central journal article supplement (PMC5910287)
Supplement: NIHMS944926-supplement-Supplemental.pdf [file NIHMS944926-supplement-Supplemental.pdf]

# Incorporation of non-proteinogenic amino acid incorporation in class I and II lantibiotics

Nidhi Kakkar, Jessica G. Perez, Wenshe R. Liu, Michael C. Jewett, Wilfred A. van der Donk\*

## Supporting Information

### Materials

All oligonucleotides, restriction endonucleases, and DNA polymerases were purchased from Integrated DNA Technologies, New England Biolabs or Invitrogen. Media components for bacterial cultures were purchased from Difco laboratories. Chemicals were purchased from Fisher Scientific or from Aldrich unless noted otherwise. Non-canonical amino acids were purchased from Chem Impex International. Solvents commonly used in peptide purification, including trifluoroacetic acid (TFA) and acetonitrile (MeCN), were obtained in RP-HPLC grade or better and used directly without further purification. Endoproteinase LysN and trypsin were purchased from Roche Biosciences or Worthington Biosciences. *E. coli* DH5 $\alpha$  was used as host for cloning and plasmid isolation, and *E. coli* BL21 (DE3) or genomically recoded organism (GRO) C321. $\Delta$ prfA-T7RNAP $\Delta$ rne $\Delta$ ompT $\Delta$ lon<sup>1</sup> were used as a host for co-expression.

### General methods

All polymerase chain reactions (PCR) were carried out on a C1000™ thermal cycler (Bio-Rad). DNA sequencing was carried out by ACGT Inc. using appropriate primers. Matrix-assisted laser desorption/ionization time-of-flight mass spectrometry (MALDI-ToF MS) was carried out on a UltrafleXtreme TOF/TOF mass spectrometer (Bruker Daltonics) at Mass Spectrometry Facility (UIUC).

### Construction of pRSFDuet-1/*nisA* mutants+*nisB* and pCDFDuet-1/*nisC*/*pylT*

The amber codon TAG was introduced into *nisA*/*nisB*/pRSFDuet-1 at different positions of *nisA*, generating co-expression vectors encoding NisA-T2B, NisA-I4V/S5B/L6G, and NisA-M21B, where B stands for the amber stop codon. The mutants were generated using QuikChange PCR with the *nisA*/*nisB*/pRSFDuet-1 vector as the template.<sup>2</sup> The primer sequences are listed in Table S1. The PCR mixture included 1 $\times$  Phusion HF buffer (New England BioLabs), dNTP mixture (2 mM each), primers (stock solution 100  $\mu$ M each, final concentration 1  $\mu$ M each), DMSO (2%, v/v), template plasmid *nisA*/*nisB*/pRSFDuet-1 (~ 40 ng) and Phusion High-Fidelity DNA Polymerase (0.02 U/ $\mu$ L). The PCR amplification was performed by twenty five cycles of denaturing (98 °C for 10 s), annealing (57.5 °C for 30 s), and extending (72 °C for 150 s). The product pNisA1.x (Table S3) was purified by QIA quick PCR Purification Kit (QIAGEN). The purified PCR product was mixed with 2  $\mu$ L of 10x NEBuffer 4

and 2  $\mu$ L of DpnI (stock solution 20,000 U/mL, New England Biolabs), followed by incubation at 37 °C for 1 h. DpnI was heat-inactivated by incubation at 80 °C for 20 min. A 5  $\mu$ L aliquot of the resulting solution was used for heat shock transformation of *E. coli* DH5 $\alpha$ .

One copy of *nisC* was inserted between *Bgl*III and *Xho*I restriction sites into the MCS2 of *pCDFDuet-1* via PCR amplification, digestion, and ligation using *nisC/pACYCDuet-1*<sup>2</sup> as the PCR template. In order to raise the copy number of MmPylT expressed in the host cells, one copy of Mmpyrrolysyl-tRNA (pylT) was introduced between *Bam*HI and *Not*I restriction sites into the MCS1 of the constructed *nisC/pCDFDuet-1* using the the *pEVOL-pylT-mmPylRS(2X)-N346A/C348A* vector as the PCR template, resulting in *pNisTC* (Table S3). The primer sequences are listed in Table S1.

A copy of *nisB* with *E. coli*-optimized codons was inserted into MCS2 of *pNisTC* after the *nisC* gene separated by ribosome binding site (rbs) via PCR amplification using appropriate primers and then Gibson ligated using the vendor's protocol to arrive at *pNisTCB* plasmid. An additional copy of *nisB* was inserted in a similar fashion after the first copy of *nisB* gene separated by a rbs to produce *pNisTCBB*.

**Table S1.** Sequences of oligonucleotide primers used to prepare analogs of nisin.

| Primer Name                | Primer Sequence (5'-3')                                                                           |
|----------------------------|---------------------------------------------------------------------------------------------------|
| proK_BamHI_FP              | ATA ATA TGG GAT CCG TGT GCT TCT CAA ATG CCT<br>GAG GCC                                            |
| tRNA_NotI_RP               | ATA ATA TGG CGG CCG CCA TGC AAA AAA GCC TGC<br>TCG TTG                                            |
| NisA_T2B_FP                | CAG GTG CAT CAC CAC GCA TTT AGA GTA TTT CGC<br>TAT G                                              |
| NisA_T2B_QRP               | GCG TGG TGA TGC ACC TGA ATC TTT CTT CG                                                            |
| NisA_M21B_FP               | GAG CTC TGA TGG GTT GTA ACT AGA AAA CAG CAA<br>CTT G                                              |
| NisA_M21B_QRP              | GTT ACA ACC CAT CAG AGC TCC TGT TTT ACA ACC                                                       |
| NisC_T7_PacI_FP            | TCC AGG CAT TAA TTA ACG AAA TTA ATA CGA CTC<br>ACT ATA GGG G                                      |
| NisC_AvrII_RP              | ATA ATA TGC CTA GGT CAT TTC CTC TTC CCT CCT<br>TTC                                                |
| NisC/RBS/optNisB/Fgib      | GAT TTT TTG AAA GGA GGG AAG AGG AAA TGA AGG<br>AGA TAT ACC ATG ATC AAA AGC TCC TTT AAA GCA<br>CAG |
| optNisB/PacI/pCDFDuet/Rgib | GCG GTG GCA GCA GCC TAG GTT AAT TAA TTA TTT<br>CAT ATA TTC TTC GCT CAC AAA CAG ACG                |

|                       |                                                                                          |
|-----------------------|------------------------------------------------------------------------------------------|
| NisBend/RBS/NisB/Fgib | TTC GGA AGA ATA CAT GAA ATG AAG GAG ATA TAC<br>CAT GAT AAA AAG TTC ATT TAA AGC TCA ACC G |
| pCDF/PacI/NisB/Rgib   | GCG GTG GCA GCA GCC TAG GTT AAT TAA TCA TTT<br>CAT GTA TTC TTC CGA AAC AAA C             |

### Construction of pRSFDuet-1/*lctA* mutants+*lctM*+*pylT*

The amber codon TAG was introduced into *histagged-lctA(wt)/lctM/pylT/pRSFDuet-1* at different positions of *lctA*, generating co-expression vectors encoding LctA-W19B, LctA-F21B, and LctA-F23B, where B stands for the amino acid to be introduced via the amber stop codon. The mutants were generated using QuikChange PCR with the *histagged-lctA(wt)/lctM/pylT/pRSFDuet-1*<sup>3</sup> vector as the template. The primer sequences are listed in Table S2. To improve solubility of these peptides,<sup>4</sup> the N15R mutation was introduced via QuikChange PCR.

**Table S2.** Oligonucleotide sequences of primers used for preparing analogs of lacticin 481.

| Primer Name            | Primer Sequence (5'-3')                                 |
|------------------------|---------------------------------------------------------|
| LctA_Trp19Stop_N15R_FP | CA ATT TCT CAT GAA TGT CGC ATG AAT AGC TAG CAA<br>TTT G |
| LctA_Trp19Stop_N15R_RP | CAA ATT GCT AGC TAT TCA TGC GAC ATT CAT GAG AAA<br>TTG  |
| LctA_F21Stop_FP*       | ATG AAT AGC TGG CAA TAG GTA TTT ACT TGC TGC             |
| LctA_F21Stop_RP*       | GCA GCA AGT AAA TAC CTA TTG CCA GCT ATT C               |
| LctA_Phe23Stop_FP*     | AGC TGG CAA TTT GTA TAG ACT TGC TGC TC                  |
| LctA_Phe23Stop_RP*     | GAG CAG CAA GTC TAT ACA AAT TGC CAG C                   |
| LctA_N15R_FP_new       | CA ATT TCT CAT GAA TGT CGC ATG AAT AGC TGG C            |
| LctA_N15R_RP_new       | GCC AGC TAT TCA TGC GAC ATT CAT GAG AAA TTG             |

### Heterologous production, purification, and characterization of lacticin 481 analogs

The lacticin 481 analogs were expressed using *E. coli* BL21 (DE3) cells transformed with pLctAMx, and pMmPyl (Table S3). An overnight culture of these cells was added to a culture flask containing synthetic media<sup>5</sup> lacking Phe, and containing kanamycin (25 mg/mL) and chloramphenicol (12.5 mg/mL). The culture was then incubated in a 37 °C shaker (220 rpm) until the optical density reached 1.0. After cooling at 4 °C for 15 min, overexpression was induced with arabinose (0.2% final concentration) and isopropyl β-D-1-thiogalactopyranoside (IPTG, 0.25 mM final concentration) in the

presence of non-proteinogenic acid (2 mM final concentration; dissolved using appropriate amount of 1 M NaOH right before use), and the flask was incubated for 12 h in a shaker at 37 °C and 220 rpm. The following morning the cells were harvested by centrifugation (11,867 ×g, 4 °C, 20 min), the supernatant was discarded and the cells were lysed using a cell homogenizer (Avestin Emulsiflex-C3; 5,000 PSI) in LanA start buffer (2 mL per 100 mL culture; 20 mM NaH<sub>2</sub>PO<sub>4</sub>, 500 mM NaCl, 0.5 mM imidazole, 20% glycerol, pH 7.5). The soluble and insoluble fractions were then separated by centrifugation (22,789 ×g, 4 °C, 20 min) and the soluble fraction was saved for purification. The insoluble fraction was suspended in LanA lysis buffer (1 mL per 100 mL culture; 6 M guanidine-HCl, 20 mM NaH<sub>2</sub>PO<sub>4</sub>, 500 mM NaCl, 0.5 mM imidazole, pH 7.5) and the suspension was sonicated. The soluble and insoluble fractions were again separated by centrifugation (22,789 ×g, 4 °C, 20 min) and the modified His<sub>6</sub>-LanA peptide was purified from the combined soluble layers using a Ni HisTrap HP column (5 mL, GE Healthcare). The column was washed with LanA wash buffer (4 M guanidine-HCl, 20 mM NaH<sub>2</sub>PO<sub>4</sub>, 500 mM NaCl, 30 mM imidazole, pH 7.5) to remove nonspecific binding proteins. The His<sub>6</sub>-LanA peptide was eluted with LanA elute buffer (3 × 5 mL, 4 M guanidine-HCl, 20 mM NaH<sub>2</sub>PO<sub>4</sub>, 100 mM NaCl, 500 mM imidazole, pH 7.5). Finally, the peptide solution was desalted by C4 SPE column (Grace Vydac).

#### **Proteolysis of full-length His-tagged modified LctA mutants, and purification of lacticin 481**

**analogs** After solid phase extraction, the full-length peptides were purified further on a C5 Phenomenex column in a Shimadzu Prep-HPLC Instrument and were observed to elute in a time range of 22-25 min when the gradient was set from 2% solvent B to 100% A (solvent A = 0.1% TFA in water, solvent B = 0.0866% TFA in 80% ACN/20% water) over a time period of 45.0 min at a flow rate of 7.0 mL /min. Lacticin 481 analogues were obtained via the proteolytic removal of the leader peptide using the endoproteinase LysN. The full-length peptides were dissolved in water, and incubated in 50 mM Tris buffer (pH 8.0), followed by the addition of LysN at a concentration of 1:100 (w/w) with respect to the peptide and incubated overnight at room temperature. Extent of cleavage was monitored using MALDI-TOF MS. The peptides were then purified using a C18-Phenomenex column in a Agilent Analytical HPLC Instrument and were observed to elute in a time range of 23-26 min when the gradient was set from 2% solvent B to 100% A (solvent A = 0.1% TFA in water, solvent B = 0.0866% TFA in 80% ACN/20% water) over a time period of 45.0 min at a flow rate of 1.0 mL /min.

#### **Heterologous production, purification, and characterization of nisin analogues using *E. coli* BL21**

**(DE3)** The nisin analogs were expressed using *E. coli* BL21 (DE3) cells transformed with pNisABx, pMmPyl, and either pNisTC or pNisTCB or pNisTCBB (Table S3).

An overnight culture of *E. coli* BL21 (DE3) cells was added to a culture flask containing synthetic media<sup>5</sup> lacking Phe, and containing kanamycin (17 mg/mL), chloramphenicol (10 mg/mL) and

spectinomycin (17 mg/mL). The culture was then incubated in a 37 °C shaker (220 rpm) until the optical density reached 1.0. After cooling at 4 °C for 15 min, overexpression was induced with arabinose (0.2% final concentration) and isopropyl β-D-1-thiogalactopyranoside (IPTG, 0.25 mM final concentration) and the flask was incubated for 16 h in a shaker at 18 °C and 220 rpm. The following morning the cells were harvested by centrifugation (11,867 ×g, 4 °C, 20 min), the supernatant was discarded, and the cells were lysed using a cell homogenizer (Avestin Emulsiflex-C3; 5,000 PSI) in LanA start buffer (2 mL per 100 mL culture; 20 mM NaH<sub>2</sub>PO<sub>4</sub>, 500 mM NaCl, 0.5 mM imidazole, 20% glycerol, pH 7.5). The soluble and insoluble layers were then separated by centrifugation (22,789 ×g, 4 °C, 20 min) and the soluble layer was saved for purification. The insoluble layer was suspended in LanA lysis buffer (1 mL per 100 mL culture; 6 M guanidine-HCl, 20 mM NaH<sub>2</sub>PO<sub>4</sub>, 500 mM NaCl, 0.5 mM imidazole, pH 7.5) and the suspension was sonicated. The soluble and insoluble layers were again separated by centrifugation (22,789 ×g, 4 °C, 20 min) and the modified His<sub>6</sub>-LanA peptide was purified from the combined soluble layers using a Ni HisTrap HP column (5 mL, GE Healthcare). The column was washed with LanA wash buffer (4 M guanidine-HCl, 20 mM NaH<sub>2</sub>PO<sub>4</sub>, 500 mM NaCl, 30 mM imidazole, pH 7.5) to remove nonspecific binding proteins. The His<sub>6</sub>-LanA peptide was eluted with LanA elute buffer (3 × 5 mL, 4 M guanidine-HCl, 20 mM NaH<sub>2</sub>PO<sub>4</sub>, 100 mM NaCl, 500 mM imidazole, pH 7.5). Finally, the peptide solution was desalted with a C4 SPE column (Grace Vydac).

**Table S3.** List of plasmids used.

| Plasmid                                                             | Marker    | Insert/Mutation                                                                 | Site                                                                                                                       | Reference    |
|---------------------------------------------------------------------|-----------|---------------------------------------------------------------------------------|----------------------------------------------------------------------------------------------------------------------------|--------------|
| <i>phistagged-nisA/nisB/pRSFDuet-1</i>                              | Kanamycin | His-tagged- <i>nisA</i> ( <i>wt</i> ) and <i>nisB</i> genes                     | <i>nisA</i> inserted between <i>Bam</i> HI and <i>Hind</i> III; <i>nisB</i> inserted between <i>Nde</i> I and <i>Xho</i> I | <sup>2</sup> |
| <i>pNisAB1</i> derivative of <i>phistagged-nisA/nisB/pRSFDuet-1</i> | Kanamycin | <i>His-tagged-nisA-T2B</i> (B = amber stop codon) and <i>nisB</i> genes         |                                                                                                                            | This work    |
| <i>pNisAB2</i> derivative of <i>phistagged-nisA/nisB/pRSFDuet-1</i> | Kanamycin | <i>His-tagged-nisA-I4V/S5B/L6G</i> (B = amber stop codon) and <i>nisB</i> genes |                                                                                                                            | This work    |
| <i>pNisAB3</i>                                                      | Kanamycin | <i>Histagged-nisA-M21B</i> (B = amber                                           |                                                                                                                            | This work    |

|                                                      |                 |                                                                           |                                                                                                                                                                                           |              |
|------------------------------------------------------|-----------------|---------------------------------------------------------------------------|-------------------------------------------------------------------------------------------------------------------------------------------------------------------------------------------|--------------|
| derivative of <i>phistagged-nisA/nisB/pRSFDuet-1</i> |                 | stop codon) and <i>nisB</i> genes                                         |                                                                                                                                                                                           |              |
| <i>pNisC/pCDFDuet-1</i>                              | Spectinomycin   | <i>nisC</i>                                                               | <i>Bgl</i> III and <i>Xho</i> I (MCS2)                                                                                                                                                    | This work    |
| <i>pNisTC</i>                                        | Spectinomycin   | <i>nisC</i> and <i>mmPylT tRNA</i> in <i>pCDFDuet-1</i>                   | <i>Bam</i> HI and <i>Not</i> I (MCS1) in <i>pNisC/pCDFDuet-1</i>                                                                                                                          | This work    |
| <i>pNisTCB</i>                                       | Spectinomycin   | <i>nisB</i> , <i>nisC</i> and <i>mmPylT tRNA</i> in <i>pCDFDuet-1</i>     | <i>rbs-nisB</i> gene inserted right after the <i>nisC</i> gene in <i>pNisTC</i>                                                                                                           | This work    |
| <i>pNisTCBB</i>                                      | Spectinomycin   | <i>nisB</i> (2X), <i>nisC</i> and <i>mmPylT tRNA</i> in <i>pCDFDuet-1</i> | Additional copy of <i>rbs-nisB</i> inserted right after the <i>nisB</i> gene in <i>pNisTCB</i>                                                                                            | This work    |
| <i>pMmPyl</i>                                        | Chloramphenicol | <i>pylT-mmPylRS(2X)-N346A/C348A</i> in <i>pEVOL</i>                       | Sequential insertion of two copies of N346A/C348A <i>pylT</i> between <i>Spe</i> I and <i>Sal</i> I; <i>pylT</i> gene inserted between <i>Apa</i> LI and <i>Xho</i> I                     | <sup>6</sup> |
| <i>phistagged-lctA(wt)/lctM/pylT/pRSFDuet-1</i>      | Kanamycin       | <i>Histagged-lctA(wt)</i> , <i>lctM</i> and <i>pylT</i>                   | <i>lctA(wt)</i> inserted between <i>Eco</i> RI and <i>Not</i> I; <i>lctM</i> inserted between <i>Bgl</i> III and <i>Xho</i> I; <i>pylT</i> inserted between <i>Age</i> I and <i>Drd</i> I | <sup>3</sup> |

|                                                                                 |           |                                                                                     |  |           |
|---------------------------------------------------------------------------------|-----------|-------------------------------------------------------------------------------------|--|-----------|
| <i>pLctAM1</i><br>derivative of <i>phistagged-lctA(wt)/lctM/pylT/pRSFDuet-1</i> | Kanamycin | <i>Histagged-lctA-N15R/W19B</i> (B = amber stop codon), <i>lctM</i> and <i>pylT</i> |  | This work |
| <i>pLctAM2</i><br>derivative of <i>phistagged-lctA(wt)/lctM/pylT/pRSFDuet-1</i> | Kanamycin | <i>Histagged-lctA-N15R/F21B</i> (B = amber stop codon), <i>lctM</i> and <i>pylT</i> |  | This work |
| <i>pLctAM3</i><br>derivative of <i>phistagged-lctA(wt)/lctM/pylT/pRSFDuet-1</i> | Kanamycin | <i>Histagged-lctA-N15R/F23B</i> (B = amber stop codon), <i>lctM</i> and <i>pylT</i> |  | This work |

### Heterologous production, purification, and characterization of nisin analogues using *GRO*

The nisin analogues were expressed using *GRO* transformed with with pNisABx, pMmPyl and pNisTC (Table S3). This strain was always maintained at temperatures below 32 °C (mostly 30 °C) to avoid triggering lambda-red mediated mutagenesis.<sup>1, 7</sup>

An overnight culture of *E. coli* BL21 (DE3) cells was added to a culture flask containing LB media containing kanamycin (17 mg/mL), chloramphenicol (10 mg/mL) and spectinomycin (17 mg/mL). The culture was then incubated in a 30 °C shaker (220 rpm) until the optical density reached 0.8. After cooling at 4 °C for 15 min, overexpression was induced with arabinose (0.2% final concentration) and isopropyl β-D-1-thiogalactopyranoside (IPTG, 0.4 mM final concentration) in the presence of non-proteinogenic acid (4 mM final concentration; dissolved using an appropriate amount of 1 M NaOH right before use) and the flask was incubated for 20 h in a shaker at 18 °C and 220 rpm. The following morning the cells were harvested by centrifugation (11,867 ×g, 4 °C, 20 min), the supernatant was discarded and the cells were lysed using a cell homogenizer (Avestin Emulsiflex-C3; 5,000 PSI) in LanA start buffer (2 mL per 100 mL culture; 20 mM NaH<sub>2</sub>PO<sub>4</sub>, 500 mM NaCl, 0.5 mM imidazole, 20% glycerol, pH 7.5). The soluble and insoluble fractions were then separated by centrifugation (22,789 ×g, 4 °C, 20 min) and the soluble layer was saved for purification. The insoluble fraction was suspended in LanA lysis buffer (1 mL per 100 mL culture; 6 M guanidine-HCl, 20 mM NaH<sub>2</sub>PO<sub>4</sub>, 500 mM NaCl, 0.5 mM imidazole, pH 7.5) and the suspension was sonicated. The soluble and insoluble layers were again separated by centrifugation (22,789 ×g, 4 °C, 20 min) and the modified His<sub>6</sub>-LanA peptide was purified from the combined soluble layers using a Ni HisTrap HP column (5 mL, GE Healthcare). The

column was washed with LanA wash buffer (4 M guanidine-HCl, 20 mM NaH<sub>2</sub>PO<sub>4</sub>, 500 mM NaCl, 30 mM imidazole, pH 7.5) to remove nonspecific binding proteins. The His<sub>6</sub>-LanA peptide was eluted with LanA elute buffer (3 × 5 mL, 4 M guanidine-HCl, 20 mM NaH<sub>2</sub>PO<sub>4</sub>, 100 mM NaCl, 500 mM imidazole, pH 7.5). Finally, the peptide solution was desalted by using a C4 SPE column (Grace Vydac).

### **Proteolysis of full-length His-tagged NisA mutants, and purification of nisin analogues**

After solid phase extraction, the full-length peptides were purified further on a C5-Phenomenex column using a Shimadzu Prep-HPLC Instrument and were observed to elute in a time range of 23-25 min when the gradient was set from 2% solvent B to 100%A (solvent A = 0.1% TFA in water, solvent B = 0.0866% TFA in 80% ACN/20% water) over a time period of 45.0 min at a flow rate of 7.0 mL /min. Nisin analogues were obtained via the proteolytic removal of the leader peptide using the endoproteinase trypsin. The full-length peptides were dissolved in water, and incubated in 50 mM Tris buffer (pH 8.0), followed by the addition of trypsin at a concentration of 1:100 (w/w) with respect to the peptide and incubated for 3 h at room temperature. The extent of cleavage was monitored using MALDI-TOF MS. The peptides were then purified using a C18-Phenomenex column in a Agilent Analytical HPLC Instrument and were observed to elute in a time range of 22-24 min when the gradient was set from 2% solvent B to 100%A (solvent A = 0.1% TFA in water, solvent B = 0.0866% TFA in 80% ACN/20% water) over a time period of 45.0 min at a flow rate of 1.0 mL /min.

### **Agar diffusion growth inhibition assay of lacticin 481, nisin and analogs**

HPLC-purified peptides were dissolved in water, lyophilized and redissolved in water. Isolation of authentic lacticin 481 has been described previously.<sup>3</sup> For lacticin 481 bioactivity assays, overnight cultures of *L. lactis* HP were diluted in M-17 agar containing 0.5 % glucose to an OD<sub>600</sub> of 0.05. A total of 10 µL of 12.5 µM solution was spotted. The plates were incubated at 30 °C for 20 h.

For nisin bioactivity assays, overnight cultures of *L. lactis* HP were diluted in M-17 agar containing 0.5% glucose to an OD<sub>600</sub> of 0.05. A total of 10 µL of 5 µM commercial, HPLC-purified nisin and analogues was spotted. The plates were incubated at 30 °C for 18 h.

### **Determination of MIC and IC<sub>50</sub> values against liquid cultures of *L. lactis* HP**

Ninety-six well microtiter plates were used to determine MIC and IC<sub>50</sub> values. A total volume of culture in each well was 100 µL; the experimental wells contained 15 µL of diluted peptide at defined concentrations and 85 µL of a culture of *L. lactis* HP indicator strain (OD<sub>600</sub> = 0.9 – 1.0) in GM17 medium (M17 media with 2% glucose) diluted 1-to-10 in fresh liquid GM17 medium. The peptide concentrations ranged from 25 µM to 11.9 nM. Each plate contained two lanes for controls: 85 µL fresh GM17 medium and 15 µL sterile Millipore water, and 85 µL of untreated 1-in-10 diluted culture and 15 µL sterile Millipore water. The optical density at 600 nm (OD<sub>600</sub>) was recorded at hourly intervals



from 0 to 5 h with an additional measurement at 18 h using a BioTek Synergy 2 plate reader. Plates were incubated at 30 °C between readings. The MIC values reported are the concentrations where no growth was observed after 18 h.

Blanks (growth medium and sterile Millipore water only) were averaged and then subtracted from the averages of triplicate experimental readings. Growth curves vs. peptide concentration were developed, and curve fits for IC<sub>50</sub> determination were produced by fitting data with OriginPro 8 software using the dose-response curve. IC<sub>50</sub> values were calculated from this fit. The fitted curves are shown in Figure S12.

**SUPPLEMENTARY FIGURES:**

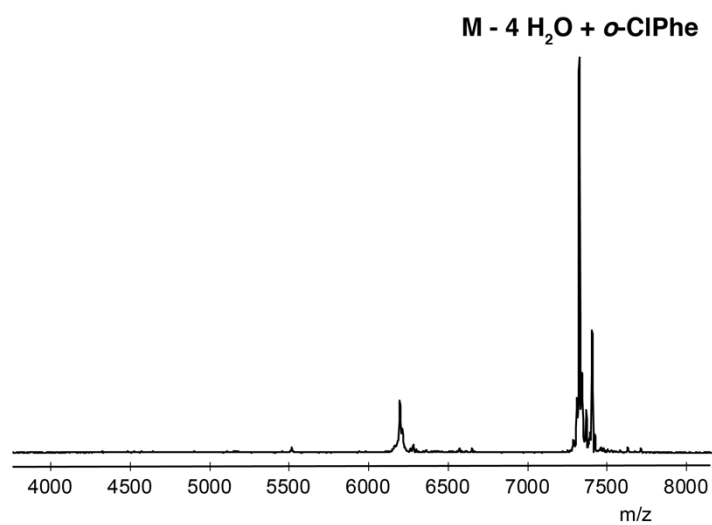

**Figure S1.** MALDI-TOF mass spectrum of His-tagged-LctA-N15R/W19 $o$ -CIPhe modified by LctM in *E. coli* BL21(DE3).

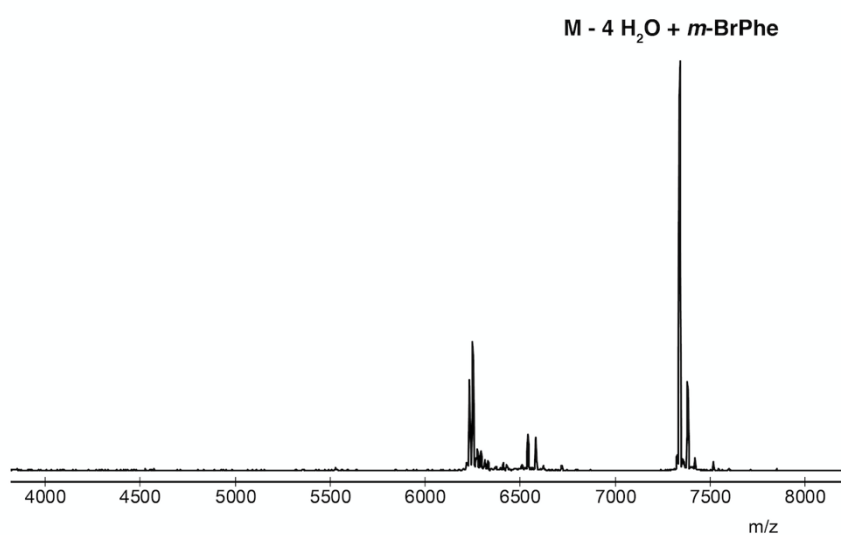

**Figure S2.** MALDI-TOF mass spectrum of His-tagged-LctA-N15R/W19 $m$ -BrPhe, modified by LctM in *E. coli* BL21(DE3).

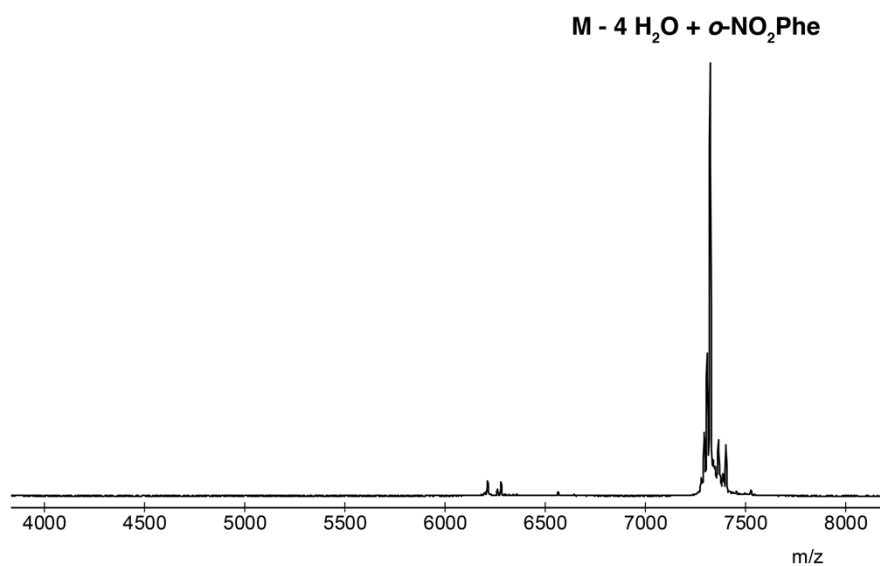

**Figure S3.** MALDI-TOF mass spectrum of His-tagged-LctA-N15R/W19o-NO<sub>2</sub>Phe, modified by LctM in *E. coli* BL21(DE3).

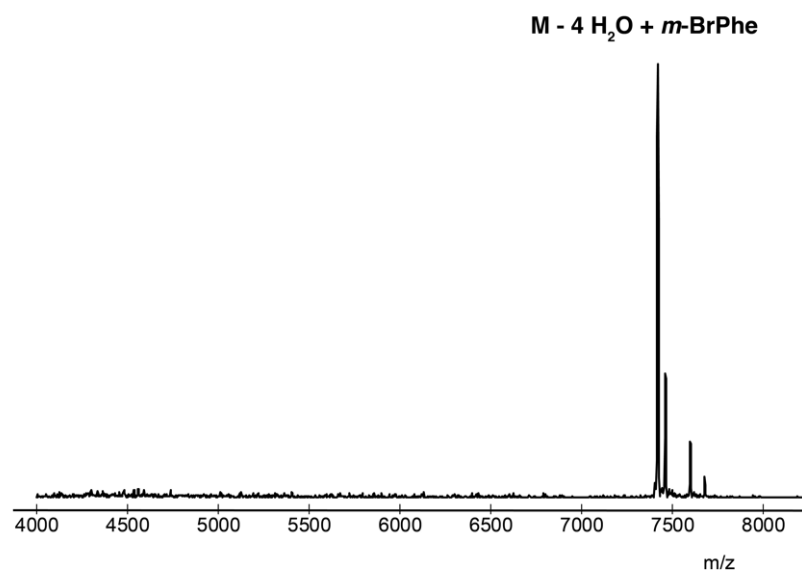

**Figure S4.** MALDI-TOF mass spectrum of His-tagged-LctA-N15R/F21m-BrPhe, modified by LctM in *E. coli* BL21(DE3).

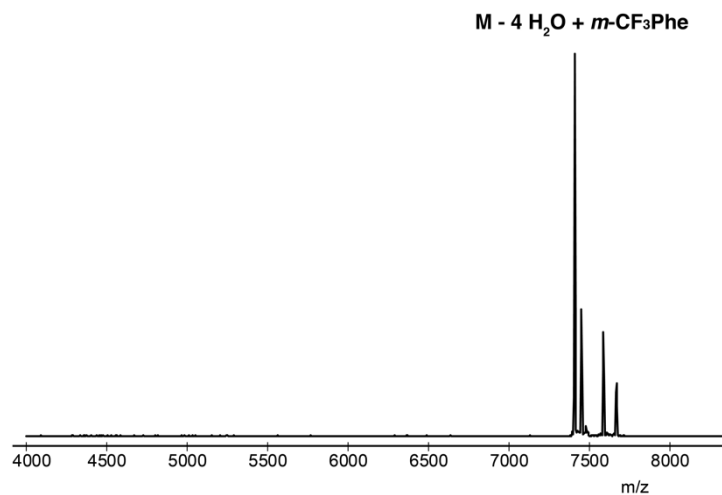

**Figure S5.** MALDI-TOF mass spectrum of His-tagged-LctA-N15R/F21*m*-CF<sub>3</sub>Phe, modified by LctM in *E. coli* BL21(DE3).

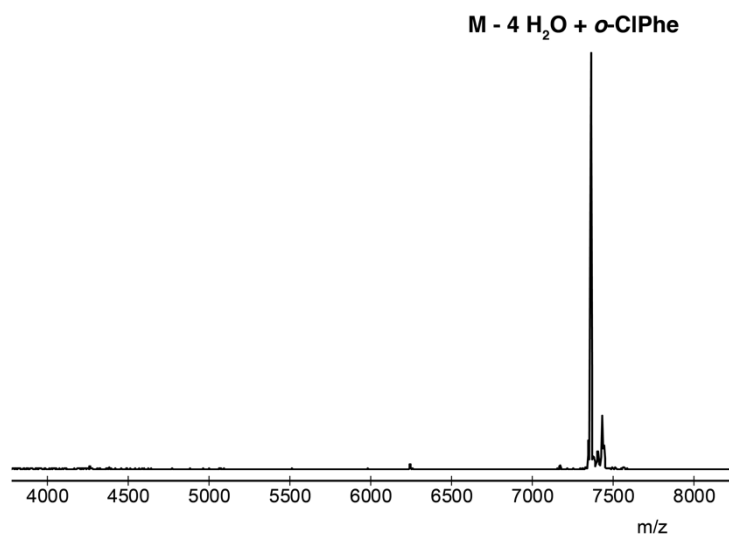

**Figure S6.** MALDI-TOF mass spectrum of His-tagged-LctA-N15R/F21*o*-CIPhe, modified by LctM in *E. coli* BL21(DE3).

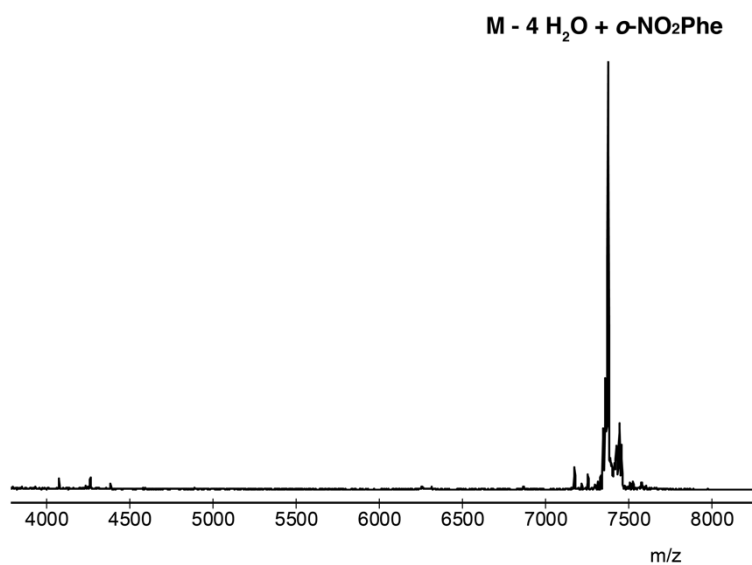

**Figure S7.** MALDI-TOF mass spectrum of His-tagged-LctA-N15R/F21o-NO<sub>2</sub>Phe, modified by LctM in *E. coli* BL21(DE3).

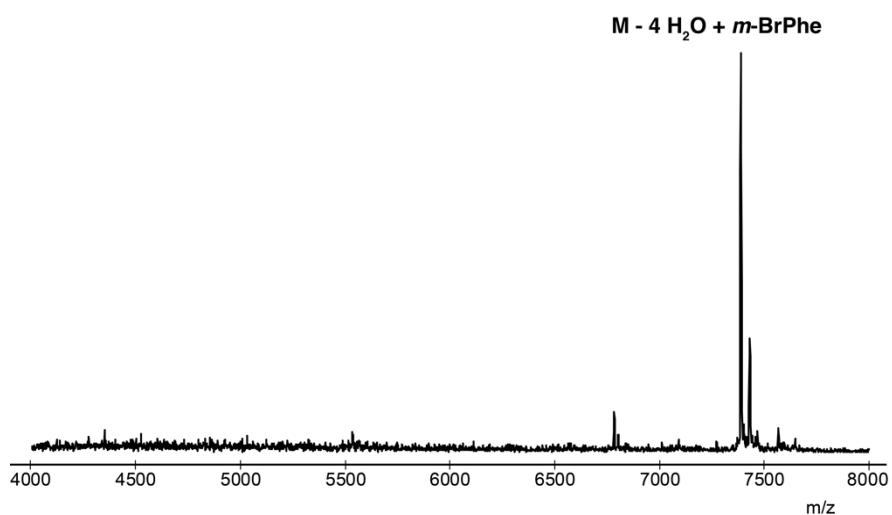

**Figure S8.** MALDI-TOF mass spectrum of His-tagged-LctA-N15R/F23m-BrPhe, modified by LctM in *E. coli* BL21(DE3).

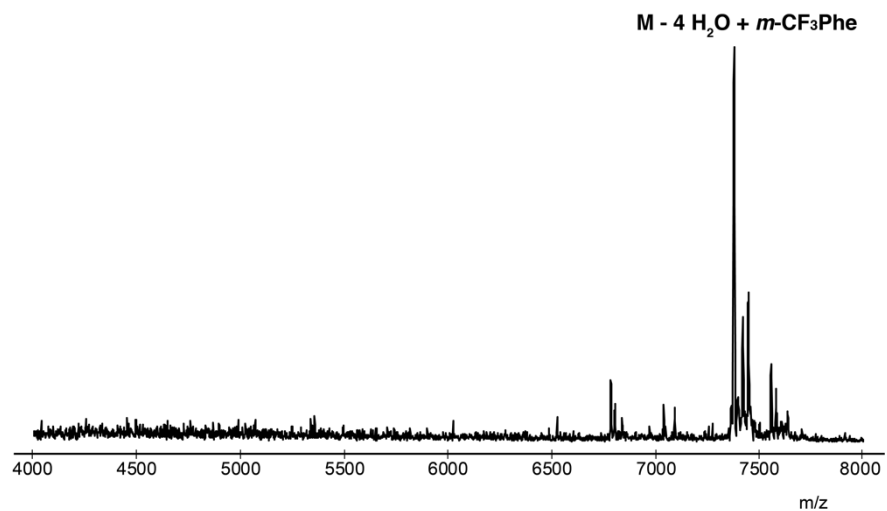

**Figure S9.** MALDI-TOF mass spectrum of His-tagged-LctA-N15R/F23m-CF<sub>3</sub>Phe, modified by LctM in *E. coli* BL21(DE3).

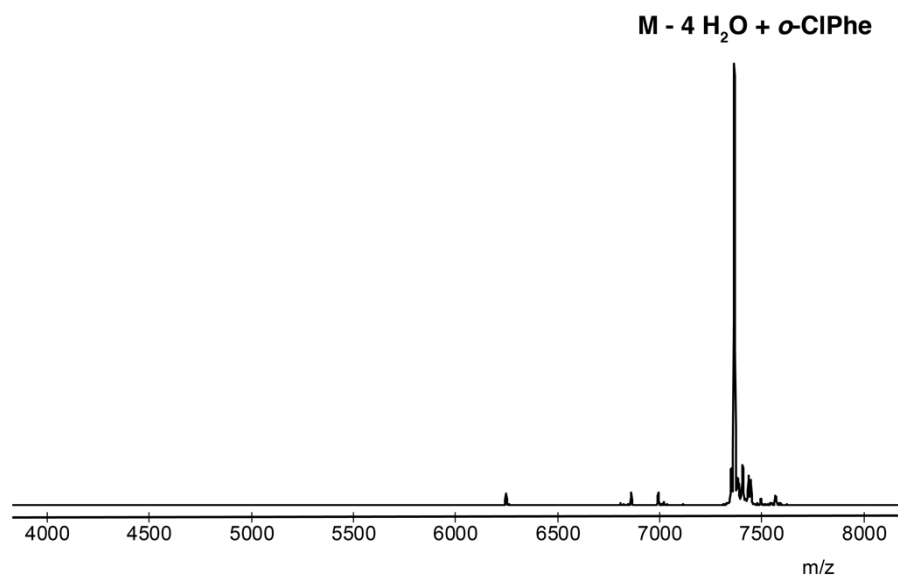

**Figure S10.** MALDI-TOF mass spectrum of His-tagged-LctA-N15R/F23o-CIPhe, modified by LctM in *E. coli* BL21(DE3).

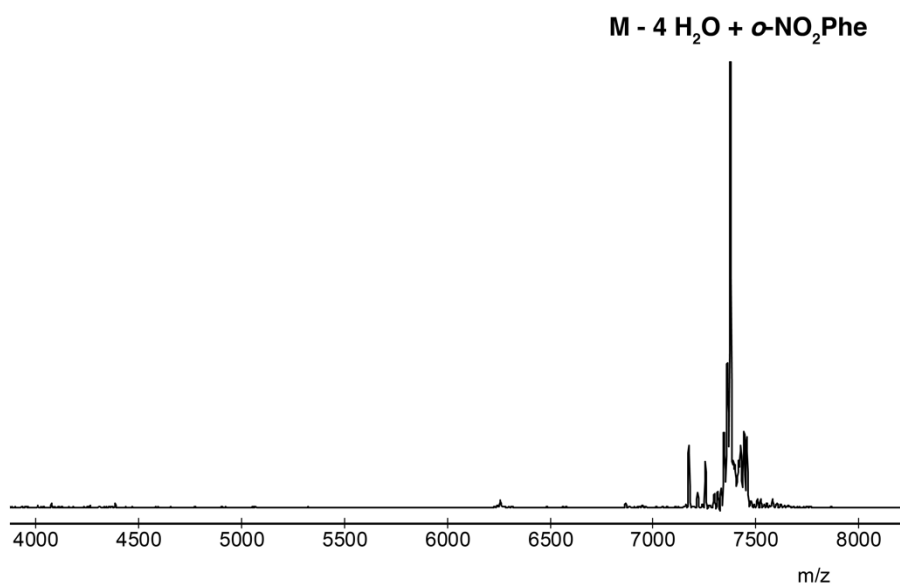

**Figure S11.** MALDI-TOF mass spectrum of His-tagged-LctA-N15R/F23o-NO<sub>2</sub>Phe, modified by LctM in *E. coli* BL21(DE3).

**Figure S12.** IC<sub>50</sub> values determined by fitting growth inhibition data wt-lactacin 481 and five analogs against *L. lactis* HP grown in liquid medium.

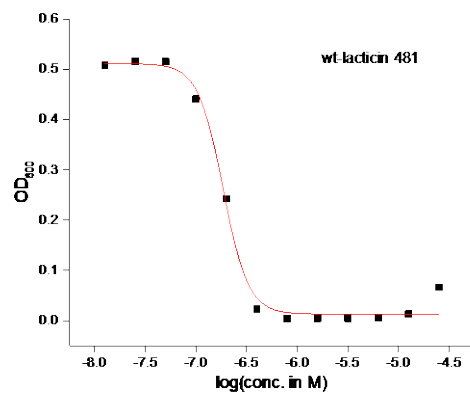

MIC = 390 nM  
IC<sub>50</sub> = 185 ± 10 nM.

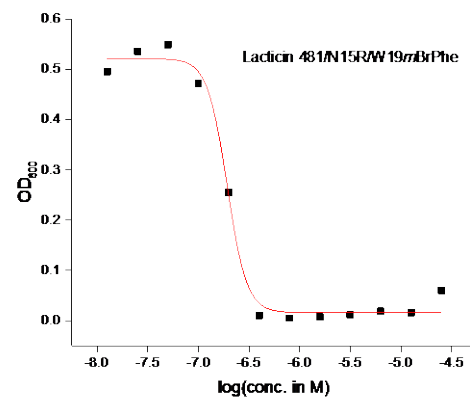

MIC = 390 nM  
IC<sub>50</sub> = 192 ± 9 nM

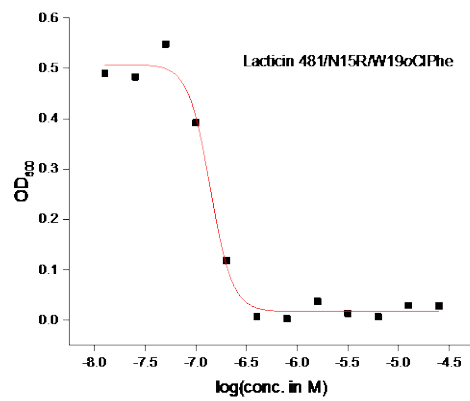

MIC = 390 nM  
IC<sub>50</sub> = 138 ± 8 nM.

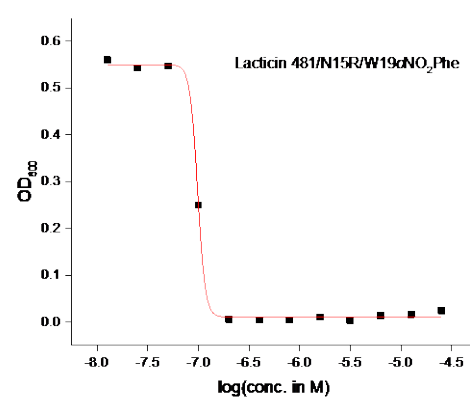

MIC = 195 nM  
IC<sub>50</sub> = 98 ± 8 nM

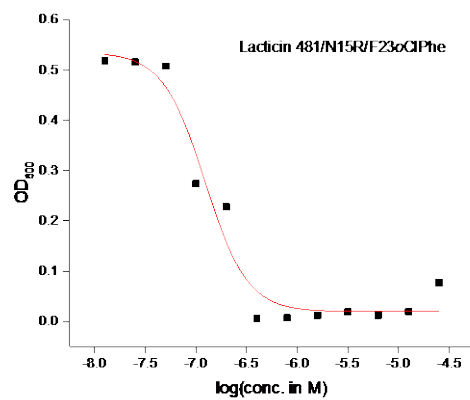

MIC = 390 nM  
IC<sub>50</sub> = 123 ± 21 nM.

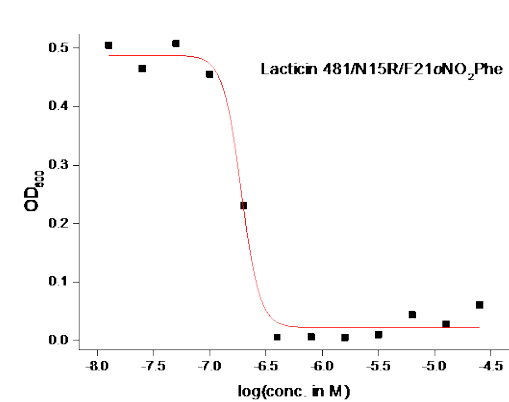

MIC = 390 nM  
IC<sub>50</sub> = 190 ± 9 nM



**Table S4.** Masses observed in MALDI-TOF mass spectra of LctA mutants after purification of full-length LctM-modified peptides. Masses shown are for 4-fold dehydrated products.

| Mutant                                                                    | Mass calculated for [M+H] <sup>+</sup> peak | Mass observed for [M+H] <sup>+</sup> peak |
|---------------------------------------------------------------------------|---------------------------------------------|-------------------------------------------|
| His-tagged-LctA-N15R/W19 <i>o</i> -ClPhe (Fig. S1)                        | 7326.53                                     | 7326                                      |
| His-tagged-LctA-N15R/W19 <i>m</i> -BrPhe (Fig. S2)                        | 7370.99                                     | 7371                                      |
| His-tagged-LctA-N15R/W19 <i>m</i> -CF <sub>3</sub> Phe (Fig. 3 main text) | 7360.09                                     | 7360                                      |
| His-tagged-LctA-N15R/W19 <i>o</i> -NO <sub>2</sub> Phe (Fig. S3)          | 7337.07                                     | 7337                                      |
| His-tagged-LctA-N15R/F21 <i>m</i> -BrPhe (Fig. S4)                        | 7410.03                                     | 7411                                      |
| His-tagged-LctA-N15R/F21 <i>m</i> -CF <sub>3</sub> Phe (Fig. S5)          | 7399.13                                     | 7399                                      |
| His-tagged-LctA-N15R/F21 <i>o</i> -ClPhe (Fig. S6)                        | 7365.57                                     | 7366                                      |
| His-tagged-LctA-N15R/F21 <i>o</i> -NO <sub>2</sub> Phe (Fig. S7)          | 7376.13                                     | 7375                                      |
| His-tagged-LctA-N15R/F23 <i>m</i> -BrPhe (Fig. S8)                        | 7410.03                                     | 7411                                      |
| His-tagged-LctA-N15R/F23 <i>m</i> -CF <sub>3</sub> Phe (Fig. S9)          | 7399.13                                     | 7400                                      |
| His-tagged-LctA-N15R/F23 <i>o</i> -ClPhe (Fig. S10)                       | 7365.57                                     | 7366                                      |
| His-tagged-LctA-N15R/F23 <i>o</i> -NO <sub>2</sub> Phe (Fig. S11)         | 7376.13                                     | 7376                                      |

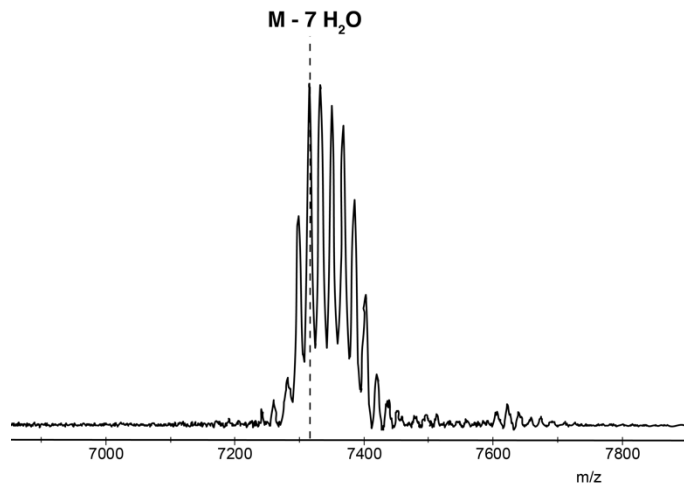

**Figure S13.** MALDI-TOF mass spectrum of wild type NisA modified by NisB and NisC in *E. coli* BL21(DE3) in synthetic media at 18 °C. Although the desired 7- and 8-fold dehydrated peptides are present, peptides that are dehydrated to a lesser extent are prevalent.  $m/z$  calculated for  $[M+H]^+$  peak for 7-fold dehydrated His-tagged-NisA = 7319.45,  $m/z$  observed for  $[M+H]^+$  peak for the labeled 7-fold dehydrated His-tagged-NisA = 7319.

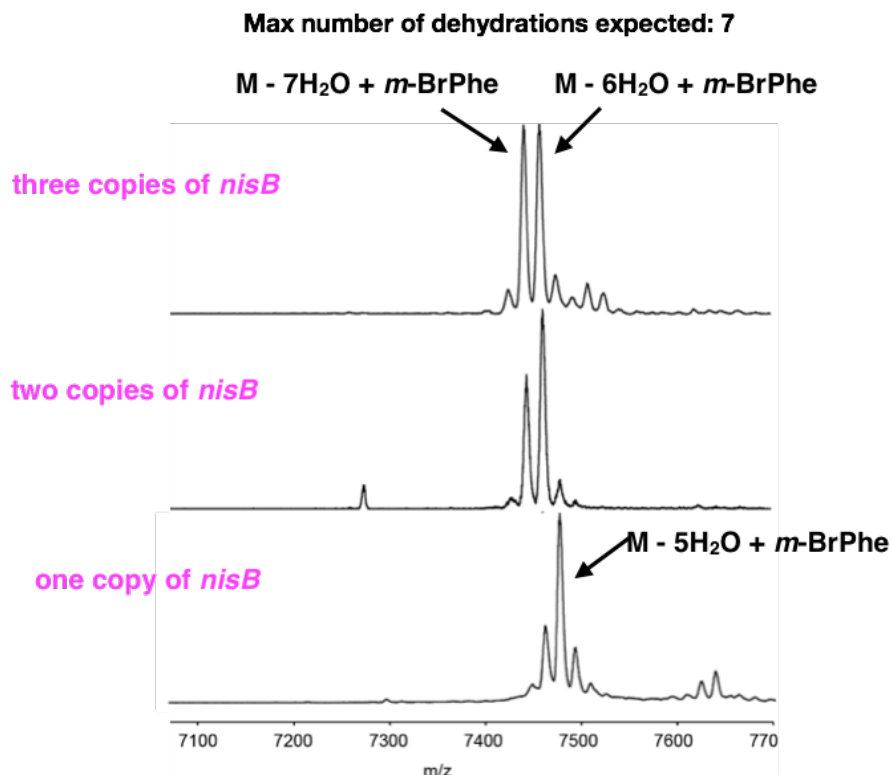

**Figure S14.** MALDI-TOF mass spectra of NisA-T2m-BrPhe modified by NisB and NisC in *E. coli* BL21(DE3) in synthetic media with multiple copies of *nisB* gene expressed.

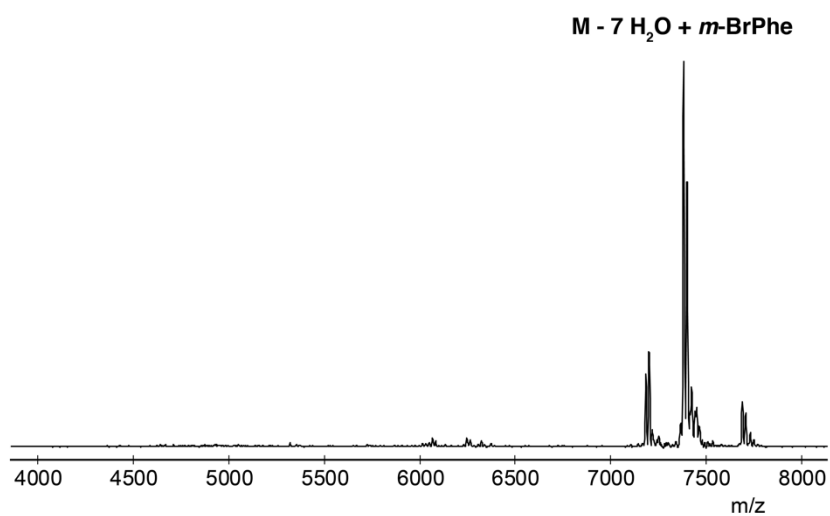

**Figure S15.** MALDI-TOF mass spectrum of NisA-I4V/S5B/L6G with S5 substituted by *m*-BrPhe, modified by NisB and NisC in *E. coli* (C321.ΔprfA-T7RNAPΔrneΔompTΔlon).

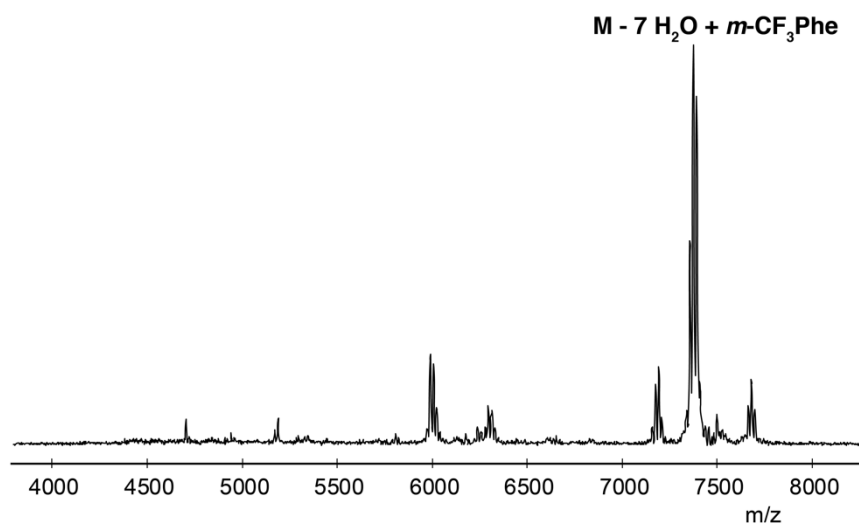

**Figure S16.** MALDI-TOF mass spectrum of NisA-I4V/S5B/L6G with S5 substituted by *m*-CF<sub>3</sub>Phe, modified by NisB and NisC in *E. coli* (C321.ΔprfA-T7RNAPΔrneΔompTΔlon).

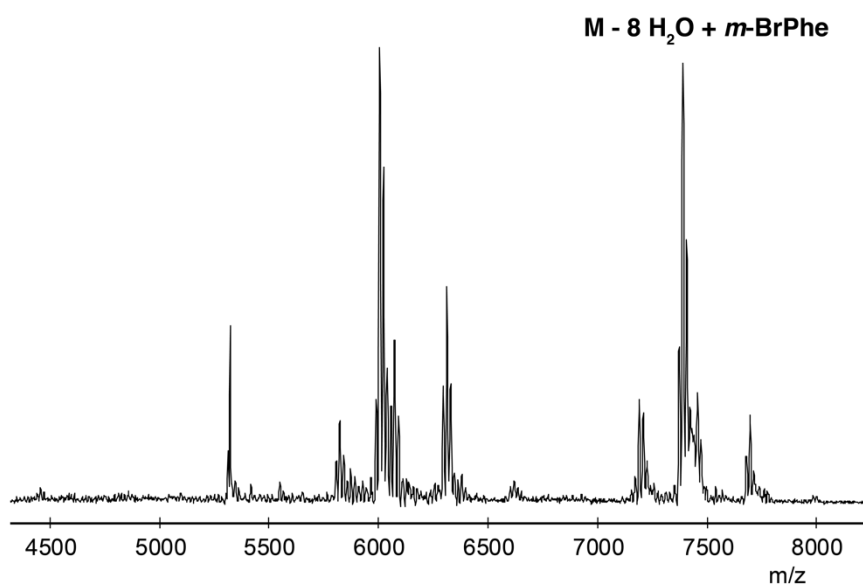

**Figure S17.** MALDI-TOF mass spectrum of NisA-M21*m*-BrPhe, modified by NisB and NisC in in *E. coli* (C321.ΔprfA-T7RNAPΔrneΔompTΔlon). The peptide was expressed in very low yields.

**Table S5.** Masses observed in MALDI-TOF mass spectra of NisA mutants after purification of full-length NisB/C-modified peptides expressed in in *E. coli* (C321.ΔprfA-T7RNAPΔrneΔompTΔlon). Masses shown are for 7-fold dehydrated products for mutations at Thr2 and Ser5, and 8-fold dehydrated peptides for mutation at Met21.

| Mutant                                                     | Mass calculated for the major peak, [M+H] <sup>+</sup> | Mass observed for the major peak, [M+H] <sup>+</sup> |
|------------------------------------------------------------|--------------------------------------------------------|------------------------------------------------------|
| His-tagged-NisA-T2 <i>m</i> -BrPhe (Fig. in the main text) | 7444.42                                                | 7445                                                 |
| His-tagged-NisA-I4V/S5 <i>m</i> -BrPhe/L6G                 | 7388.31                                                | 7389                                                 |
| His-tagged-NisA-I4V/S5 <i>m</i> -CF <sub>3</sub> Phe/L6G   | 7377.41                                                | 7378                                                 |
| His-tagged-NisA-M21 <i>m</i> -BrPhe                        | 7396.32                                                | 7396                                                 |

## References:

1. Amiram, M.; Haimovich, A. D.; Fan, C.; Wang, Y. S.; Aerni, H. R.; Ntai, I.; Moonan, D. W.; Ma, N. J.; Rovner, A. J.; Hong, S. H.; Kelleher, N. L.; Goodman, A. L.; Jewett, M. C.; Soll, D.; Rinehart, J.; Isaacs, F. J., Evolution of translation machinery in recoded bacteria enables multi-site incorporation of nonstandard amino acids. *Nat. Biotechnol.* **2015**, *33* (12), 1272-1279.
2. Shi, Y.; Yang, X.; Garg, N.; van der Donk, W. A., Production of lantipeptides in *Escherichia coli*. *J. Am. Chem. Soc.* **2011**, *133* (8), 2338-41.
3. Bindman, N. A.; Bobeica, S. C.; Liu, W. R.; van der Donk, W. A., Facile removal of leader peptides from lanthipeptides by incorporation of a hydroxy acid. *J. Am. Chem. Soc.* **2015**, *137* (22), 6975-8.
4. (a) You, Y. O.; van der Donk, W. A., Mechanistic investigations of the dehydration reaction of lactacin 481 synthetase using site-directed mutagenesis. *Biochemistry* **2007**, *46*, 5991-6000; (b) Levengood, M. R.; Knerr, P. J.; Oman, T. J.; van der Donk, W. A., In vitro mutasynthesis of lantibiotic analogues containing nonproteinogenic amino acids. *J. Am. Chem. Soc.* **2009**, *131* (34), 12024-5.
5. Hammill, J. T.; Miyake-Stoner, S.; Hazen, J. L.; Jackson, J. C.; Mehl, R. A., Preparation of site-specifically labeled fluorinated proteins for <sup>19</sup>F-NMR structural characterization. *Nat. Protoc.* **2007**, *2* (10), 2601-7.
6. Wang, Y. S.; Fang, X.; Wallace, A. L.; Wu, B.; Liu, W. R., A rationally designed pyrrolysyl-tRNA synthetase mutant with a broad substrate spectrum. *J. Am. Chem. Soc.* **2012**, *134* (6), 2950-3.
7. Murphy, K. C., Use of bacteriophage lambda recombination functions to promote gene replacement in *Escherichia coli*. *J. Bacteriol.* **1998**, *180* (8), 2063-2071.
